# Supplementary material for: A solution processed Sb2S3-based photocathode with enhanced photocatalytic performance via constructing an ultrathin TiO2 overlayer and noble metal modification
Source: Royal Society of Chemistry journal article supplement (doi:10.1039/d0se01220c), 2020-12-15
Supplement: d0se01220c1.pdf [file d0se01220c1.pdf]

## Supporting Information

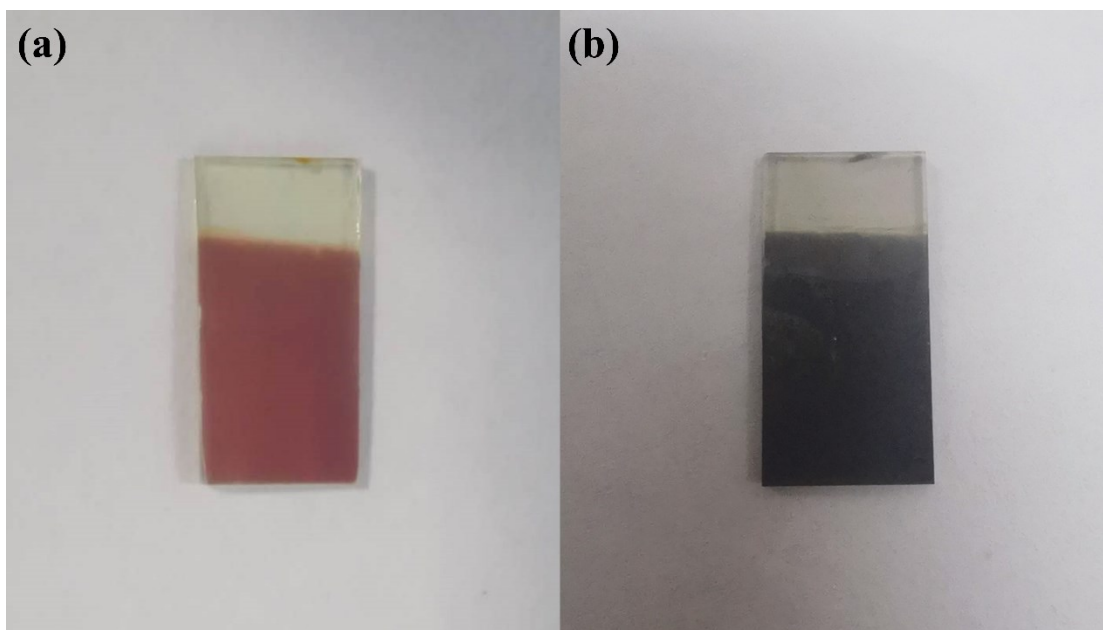

Fig.S1 (a)As-prepared  $\text{Sb}_2\text{S}_3$  photoelectrode; (b)pure  $\text{Sb}_2\text{S}_3$  electrode after annealing.

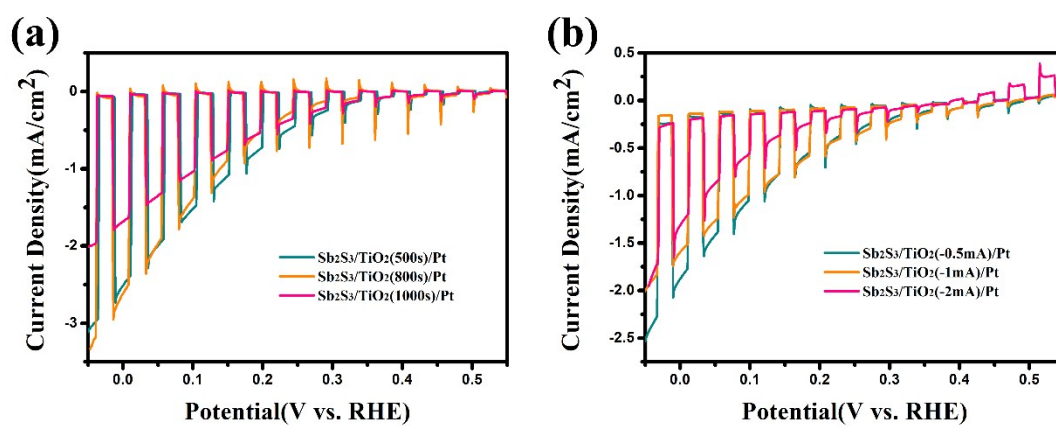

Fig.S2 (a)Current-Potential curve of photocathodes with  $\text{TiO}_2$  layer synthesized by different current density; (b)Current-Potential curve of photocathodes with  $\text{TiO}_2$  layer synthesized with different time.

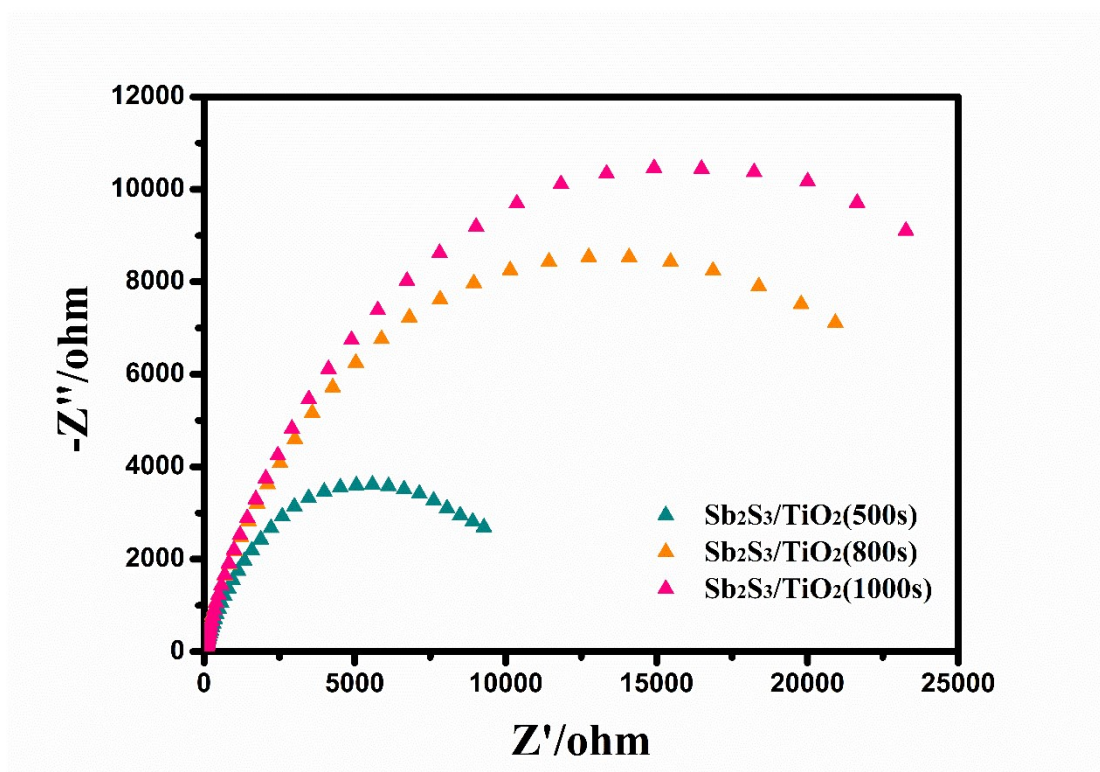

Fig.S3 Nyquist plots of  $\text{Sb}_2\text{S}_3/\text{TiO}_2$  photoelectrodes with different  $\text{TiO}_2$  deposition time without illumination.

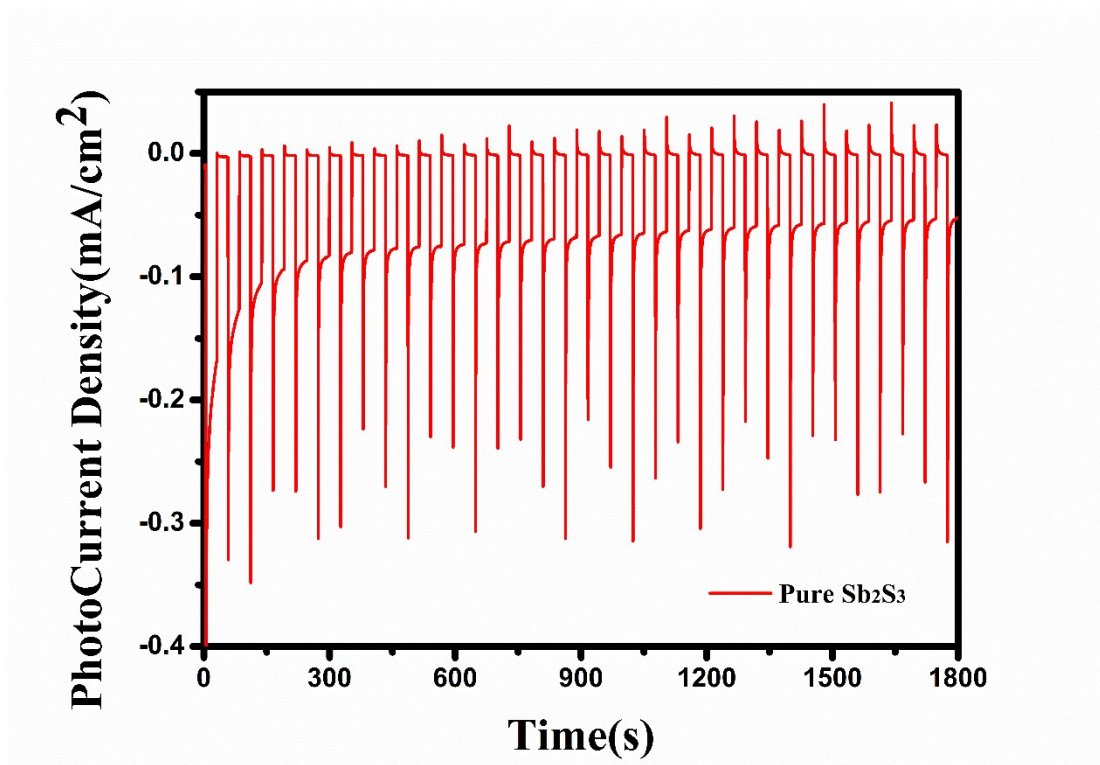

Fig.S4 Current-time curve of pure  $\text{Sb}_2\text{S}_3$  at 0 V vs. RHE.

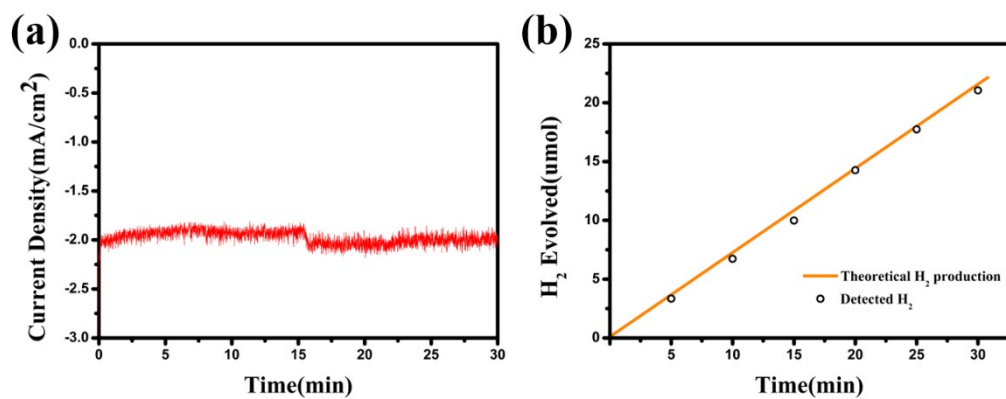

Fig.S5 (a)Current-time curve of Sb<sub>2</sub>S<sub>3</sub> based photocathode, and (b) corresponding gas measurement at 0 V vs. RHE under constant simulated sunlight illumination.

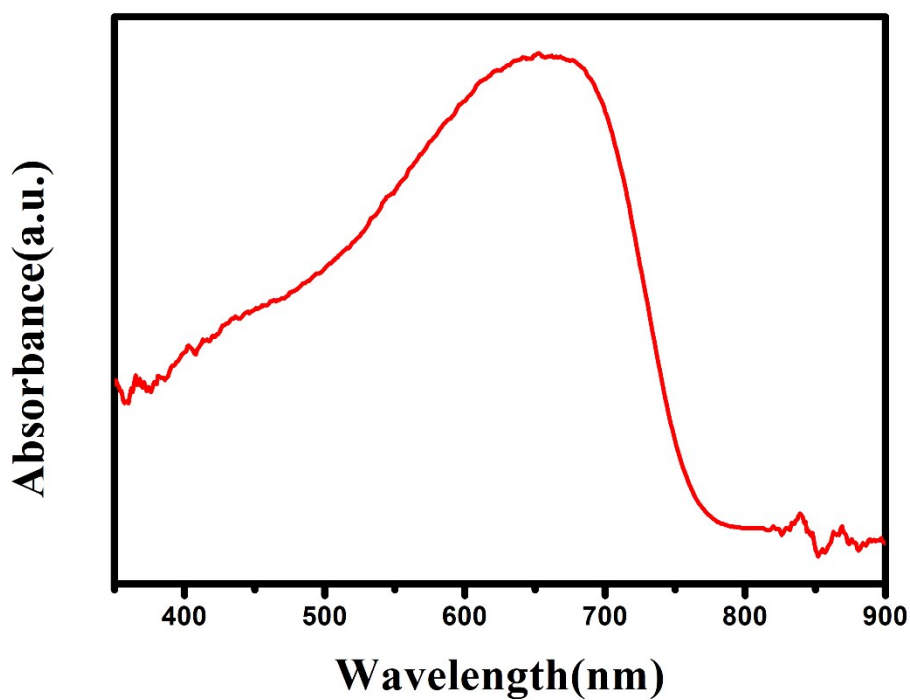

Fig.S6 UV-vis absorption curve of Sb<sub>2</sub>S<sub>3</sub>/TiO<sub>2</sub>/Pt photocathode.
